# Supplementary material
Source: HighWire-hosted journal article supplement (https://erj.ersjournals.com/content/59/3/2101798)

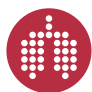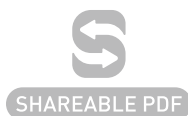

# Activation of immune cell proteasomes in peripheral blood of smokers and COPD patients: implications for therapy

Ilona E. Kammerl<sup>1</sup>, Sophie Hardy<sup>1,2</sup>, Claudia Flexeder<sup>3</sup>, Andrea Urmann<sup>1</sup>, Julia Peierl<sup>1</sup>, Yuqin Wang<sup>1</sup>, Oliver Vosyka<sup>1</sup>, Marion Frankenberger<sup>1,4</sup>, Katrin Milger<sup>1,5</sup>, Jürgen Behr<sup>1,5</sup>, Andrea Koch<sup>1,6</sup>, Juliane Merl-Pham<sup>7</sup>, Stefanie M. Hauck<sup>7</sup>, Charles Pilette<sup>2</sup>, Holger Schulz<sup>3</sup> and Silke Meiners<sup>1,8,9</sup>

<sup>1</sup>Comprehensive Pneumology Center (CPC), University Hospital, Ludwig Maximilians University, Helmholtz Zentrum München, Member of the German Center for Lung Research (DZL), Munich, Germany. <sup>2</sup>Cliniques Universitaires Saint-Luc, Dept of Pulmonology and Institute of Experimental and Clinical Research (IREC), Pole of Pulmonology, ENT and Dermatology, Université Catholique de Louvain, Brussels, Belgium. <sup>3</sup>Institute of Epidemiology, Helmholtz Zentrum München, Member of the German Center for Lung Research (DZL), Neuherberg, Germany. <sup>4</sup>Institute of Lung Biology and Disease and Comprehensive Pneumology Center with the CPC-M bioArchive, Helmholtz Zentrum München, Member of the German Center for Lung Research (DZL), Munich, Germany. <sup>5</sup>Dept of Medicine V, University Hospital, Ludwig Maximilians University, Member of the German Center for Lung Research (DZL), Munich, Germany. <sup>6</sup>Dept of Pneumology, Teaching Hospital Pyhrn-Eisenwurzen Klinikum Steyr, Steyr, Austria. <sup>7</sup>Research Unit Protein Science, Metabolomics and Proteomics Core, Helmholtz Zentrum München, Munich, Germany. <sup>8</sup>Research Center Borstel, Airway Research Center North (ARCN), Member of the German Center for Lung Research (DZL), Borstel, Germany. <sup>9</sup>Institute of Experimental Medicine, Christian-Albrechts University, Kiel, Germany.

Corresponding author: Silke Meiners ([silke.meiners@helmholtz-muenchen.de](mailto:silke.meiners@helmholtz-muenchen.de))

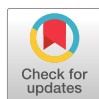

Shareable abstract (@ERSpublications)

This study demonstrates distinct activation of immunoproteasomes in peripheral blood cells of young smokers and COPD patients. Specific inhibition of the immunoproteasome might represent a novel therapeutic concept for COPD treatment. <https://bit.ly/3rEwaU7>

**Cite this article as:** Kammerl IE, Hardy S, Flexeder C, *et al.* Activation of immune cell proteasomes in peripheral blood of smokers and COPD patients: implications for therapy. *Eur Respir J* 2022; 59: 2101798 [DOI: 10.1183/13993003.01798-2021].

This single-page version can be shared freely online.

Copyright ©The authors 2022.

This version is distributed under the terms of the Creative Commons Attribution Non-Commercial Licence 4.0. For commercial reproduction rights and permissions contact [permissions@ersnet.org](mailto:permissions@ersnet.org)

This article has an editorial commentary:  
<https://doi.org/10.1183/13993003.02557-2021>

Received: 22 March 2021  
Accepted: 19 July 2021

## Abstract

**Background** Immune cells contain a specialised type of proteasome, *i.e.* the immunoproteasome, which is required for intracellular protein degradation. Immunoproteasomes are key regulators of immune cell differentiation, inflammatory activation and autoimmunity. Immunoproteasome function in peripheral immune cells might be altered by smoking and in chronic obstructive pulmonary disease (COPD), thereby affecting immune cell responses.

**Methods** We analysed the expression and activity of proteasome complexes in peripheral blood mononuclear cells (PBMCs) isolated from healthy male young smokers as well as from patients with severe COPD and compared them with matching controls.

**Results** Proteasome expression was upregulated in COPD patients as assessed by quantitative reverse transcriptase-PCR and mass spectrometry-based proteomic analysis. Proteasome activity was quantified using activity-based probes and native gel analysis. We observed distinct activation of immunoproteasomes in the peripheral blood cells of young male smokers and severely ill COPD patients. Native gel analysis and linear regression modelling confirmed robust activation and elevated assembly of 20S proteasomes, which correlated significantly with reduced lung function parameters in COPD patients. The immunoproteasome was distinctly activated in COPD patients upon inflammatory cytokine stimulation of PBMCs *in vitro*. Inhibition of the immunoproteasome reduced pro-inflammatory cytokine expression in COPD-derived blood immune cells.

**Conclusions** Given the crucial role of chronic inflammatory signalling and the emerging involvement of autoimmune responses in COPD, therapeutic targeting of the immunoproteasome might represent a novel therapeutic concept for COPD.

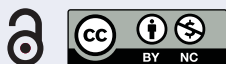

Supplement: inline-supplementary-material-2 [file inline-supplementary-material-2.pdf]
